# Supplementary material for: Ontology-Based Combinatorial Comparative Analysis of Adverse Events Associated with Killed and Live Influenza Vaccines
Source: PubMed Central journal article supplement (PMC3509157; doi:10.1371/journal.pone.0049941), 2012-11-28
Supplement: pone.0049941.s003.pdf [file pone.0049941.s003.pdf]

- TIV** (MedDRA Version 12.0 03/01/2009)
- ▼ Thing (MedDRA Version 12.0 03/01/2009)
    - ▼ Cardiac disorders
      - Cardiac disorder signs and symptoms
      - Cardiac signs and symptoms NEC
      - Palpitations
    - ▼ Eye disorders
      - Ocular infections, irritations and inflammations
      - Ocular infections, inflammations and associated manifestations
      - Eye discharge
      - Eye irritation
      - Eye pruritus
    - ▼ Gastrointestinal disorders
      - Gastrointestinal signs and symptoms
      - Gastrointestinal signs and symptoms NEC
      - Dysphagia
      - ▼ Salivary gland conditions
        - Oral dryness and saliva altered
        - Dry mouth
      - ▼ Tongue conditions
        - Tongue signs and symptoms
        - Swollen tongue
        - Tongue oedema
      - ▼ General disorders and administration site conditions
        - Administration site reactions
        - Injection site reactions
        - Injected limb mobility decreased
        - Injection site haematomas
      - ▼ General system disorders NEC
        - Feeling and sensations NEC
        - Chills
        - Feeling cold
      - ▼ General signs and symptoms NEC
        - Flushing
        - Hot flush
        - Local swelling
        - Mobility decreased
        - Pain and discomfort NEC
        - Chest pain
    - ▼ Immune system disorders
      - Autoimmune disorders
      - Autoimmune disorder NEC
      - Guillain-Barre syndrome
    - ▼ Injury, poisoning and procedural complications
      - Medication errors
        - Overdose
        - Accidental overdose
    - ▼ Investigations
      - Cardiac and vascular investigations (excl enzyme tests)
        - Vascular tests NEC (incl blood pressure)
        - Blood pressure increased
      - Heart rate and pulse investigations
      - Heart rate increased
      - ▼ Neurological, special senses and psychiatric investigations
        - Neurologic diagnostic procedures
        - Electromyogram abnormal
      - ▼ Musculoskeletal and connective tissue disorders
        - Joint disorders
          - Joint related signs and symptoms
          - Joint range of motion decreased
        - Muscle disorders
          - Muscular weakness conditions
          - Muscular weakness
        - ▼ Musculoskeletal and connective tissue disorders NEC
          - Musculoskeletal and connective tissue pain and discomfort
          - Musculoskeletal pain
          - Neck pain
          - Pain in extremity
        - Musculoskeletal and connective tissue signs and symptoms NEC
        - Sensation of heaviness
      - ▼ Nervous system disorders
        - Movement disorders (incl parkinsonism)
        - Paralysis and paresis (excl cranial nerve)
        - Paralysis
        - ▼ Neurological disorders NEC
          - Abnormal reflexes
          - Hyperreflexia
          - Paraesthesia and Dysaesthesia
          - Paraesthesia
          - Sensory abnormalities NEC
          - Hypoaesthesia
          - Notalgia
      - ▼ Psychiatric disorders
        - Communication disorders and disturbances
        - Speech articulation and rhythm disturbances
        - Dysarthria
        - Psychiatric and behavioural symptoms NEC
        - Psychiatric symptoms NEC
        - Throat tightness
      - ▼ Respiratory, thoracic and mediastinal disorders
        - Respiratory disorders NEC
          - Breathing abnormalities
          - Dyspnoea
        - Upper respiratory tract disorders (excl infections)
          - Laryngeal spasm, oedema and obstruction
          - Laryngospasm
        - Pharyngeal disorders (excl infections and neoplasms)
          - Pharyngeal oedema
      - ▼ Skin and subcutaneous tissue disorders
        - Epidermal and dermal conditions
        - Dermal and epidermal conditions NEC
        - Skin burning sensation
      - ▼ Vascular disorders
        - Vascular hypertensive disorders
        - Vascular hypertensive disorders NEC
        - Hypertension
- LAIV** (MedDRA Version 12.0 03/01/2009)
- ▼ Investigation (MedDRA Version 12.0 03/01/2009)
    - ▼ Immune system disorders
      - Immune disorders NEC
      - Vasculitis
      - Henoch-Schönlein purpura
    - ▼ Blood and lymphatic system disorders
      - Captopril and bleeding diatheses (excl thrombocytopenic)
      - Purpura (excl thrombocytopenic)
      - Henoch-Schönlein purpura
    - ▼ Social circumstances
      - Lifestyle issues
        - Disability issues
        - Impaired work ability
        - Activities of daily living impaired
      - Pregnancy, peripartum and perinatal conditions
      - Pregnancy, labour, delivery and postpartum conditions
      - High risk pregnancies
        - Drug exposure during pregnancy
    - ▼ Infections and infestations
      - ▼ Viral infectious disorders
        - Parainfluenza viral infections
        - Cramp infections
      - ▼ Skin and subcutaneous tissue disorders
        - Skin vascular abnormalities
        - Purpura and related conditions
        - Henoch-Schönlein purpura
        - Angioedema and urticaria
        - Angioedema
        - Eyidid oedema
      - ▼ Epidermal and dermal conditions
        - Postular conditions
        - Rash postular
        - Pruritus NEC
        - Pruritus generalised
        - Dermal and epidermal conditions NEC
        - Swelling face
      - ▼ Vision disorders
        - Visual disorders NEC
        - Visual impairment
      - ▼ Ocular infections, irritations and inflammations
        - Ocular infections, inflammations and associated manifestations
        - Eye irritation
        - Ocular sensory symptoms NEC
        - Ocular sensation disorders
        - Photophobia
      - ▼ Injury, poisoning and procedural complications
        - Medication errors NEC
          - Vaccination errors
          - Vaccination error
          - Medication errors due to accidental exposures
          - Accidental exposure
        - Maladministration
          - Drug administration error
          - Underdose
          - Inappropriate schedule of drug administration
          - Expired drug administered
      - ▼ Pericardial disorders
        - Noninfectious pericarditis
        - Pericarditis
      - ▼ Respiratory, thoracic and mediastinal disorders
        - Bronchial disorders (excl anaplasms)
          - Bronchospasm and obstruction
          - Asthma
        - Bronchospasm
        - Respiratory tract infections
          - Upper respiratory tract infections NEC
          - Nasopharyngitis
          - Upper respiratory tract infection
          - Sinusitis
        - Lower respiratory tract infections NEC
          - Lobar pneumonia
          - Bronchitis
          - Pneumonia
        - Viral upper respiratory tract infections
          - Cramp infections
      - ▼ Upper respiratory tract disorders (excl infections)
        - Nasal congestion, oedema and obstruction
        - Stridor
        - Nasal congestion
        - Sinus congestion
        - Nasal congestion and inflammation
        - Nasal congestion
        - Nasal disorders NEC
        - Epistaxis
      - ▼ Respiratory disorders NEC
        - Respiratory tract disorders NEC
        - Respiratory tract congestion
        - Upper respiratory tract signs and symptoms
        - Postnasal drip
        - Sneezing
        - Rhinorrhoea
        - Throat irritation
        - Dry throat
        - Sore headache
      - ▼ Vascular disorders
        - Vascular haemorrhagic disorders
          - Bruising, ecchymosis and purpura
          - Henoch-Schönlein purpura
          - Haemorrhages NEC
        - Epistaxis
        - ▼ Vascular disorders NEC
          - Cerebrovascular and spinal vascular disorders NEC
          - Migraine
      - ▼ Ear and labyrinth disorders
        - Aural disorders NEC
        - Ear disorder NEC
        - Ear pain
      - ▼ Gastrointestinal disorders
        - Oral soft tissue conditions
        - Throat irritations
        - ▼ Gastrointestinal signs and symptoms
          - Nausea and vomiting symptoms
          - Bloating
          - Gastrointestinal signs and symptoms NEC
          - Abdominal discomfort
          - Gastrointestinal and abdominal pains (excl oral and throat)
          - Abdominal pain upper
      - ▼ General disorders and administration site conditions
        - Therapeutic and nontherapeutic effects
        - Therapeutic and nontherapeutic responses
        - Immunisation reaction
      - ▼ General system disorders NEC
        - Gait disturbances
        - Ataxia
        - Arthritic conditions
        - Fatigue
      - ▼ Nervous system disorders
        - Cranial nerve disorders (excl neoplasms)
          - Facial cranial nerve disorders
          - Facial paresis
          - VIIth nerve paralysis
        - ▼ Neurological disorders NEC
          - Cerebellar coordination and balance disturbances
          - Ataxia
          - Paraesthesia and dysaesthesia
          - Burning sensation
        - ▼ Headaches
          - Migraine headaches
          - Migraine
          - Headaches NEC
      - ▼ Investigations
        - Endocrine investigations (incl sex hormones)
          - Reproductive hormone analyses
          - Pregnancy test positive
        - Cardiac and vascular investigations (excl enzyme tests)
          - ECG investigations
          - Electrocardiogram abnormal
        - Enzyme investigations NEC
          - Skeletal and cardiac muscle analyses
          - Blood creatine phosphokinase increased
        - ▼ Haematology investigations (incl blood groups)
          - White blood cell analyses
          - Lymphocyte percentage decreased
          - Neutrophil percentage increased
        - Investigations, imaging and histopathology procedures NEC
          - Computerised tomogram abnormal
          - ▼ Metabolic, nutritional and blood gas investigations
            - Carbohydrate tolerance analyses (incl diabetes)
            - Blood glucose increased
            - Metabolism tests NEC
            - Urine ketone body present
          - ▼ Microbiology and serology investigations
            - Virus identification and serology
            - Influenza serology positive
        - ▼ Neurological, special senses and psychiatric investigations
          - Central nervous system imaging procedures
          - Nuclear magnetic resonance imaging brain abnormal
        - ▼ Renal and urinary tract investigations and urinalyses
          - Urinary tract NEC
          - Urine analysis abnormal
        - ▼ Respiratory and pulmonary investigations (excl blood gases)
          - Respiratory tract and thoracic imaging procedures
          - Chest X-ray abnormal

**Supporting Figure S3.** Classification of TIV- and LAIV-specific vaccine adverse events using MedDRA.
