# Supplementary material for: Ontology-Based Combinatorial Comparative Analysis of Adverse Events Associated with Killed and Live Influenza Vaccines
Source: PLOS journal article supplement (doi:10.1371/journal.pone.0049941), 2012-11-28
Supplement: S4 (10.1371/journal.pone.0049941.s004) [file journal.pone.0049941.s004]

TIV

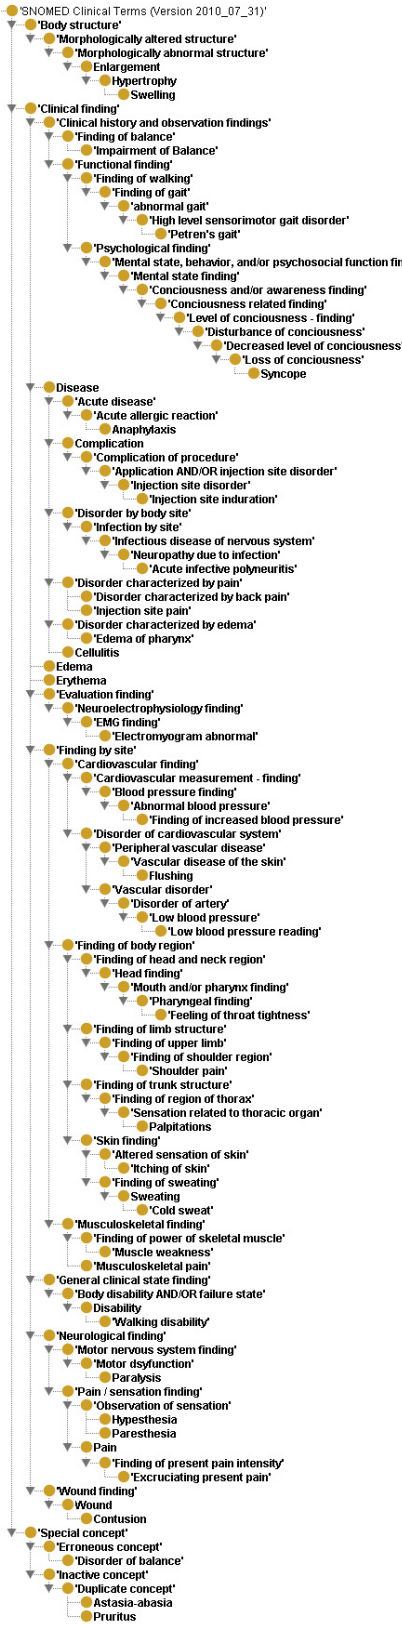

LAIV

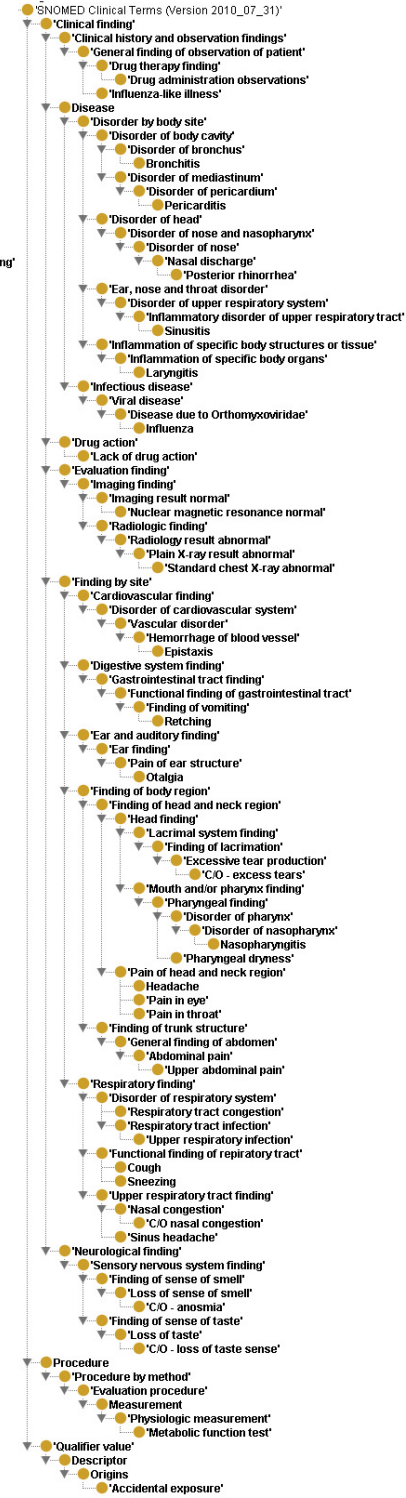

**Supporting Figure S4.** Classification of TIV- and LAIV-specific vaccine adverse events using SNOMED-CT.
